# Supplementary material for: One-step synthesis and electrochemical performance of a PbMoO4/CdMoO4 composite as an electrode material for high-performance supercapacitor applications
Source: Royal Society of Chemistry journal article supplement (doi:10.1039/c9dt01931f), 2019-01-01
Supplement: c9dt01931f1.pdf [file c9dt01931f1.pdf]

**One-step synthesis and electrochemical performance of PbMoO<sub>4</sub>/CdMoO<sub>4</sub>  
composite as electrode material for high performance super capacitor  
application**

**Tarugu Anitha<sup>a</sup>, Araveeti Eswar Reddy<sup>a</sup>, Yedluri Anil Kumar<sup>a</sup>, Young-Rae Cho<sup>b\*</sup> and  
Hee-Je Kim<sup>a\*</sup>**

<sup>a</sup>School of Electrical Engineering, Pusan National University, Gumjeong-Ku, Jangjeong-Dong,  
Busan 46241, South Korea

<sup>b</sup>School of Materials Science and Engineering, Pusan National University, San 30 Jangjeon-dong,  
Geumjeong-gu, Busan 609-735, Republic of Korea

\*Corresponding authors. Tel.: +8251 510 2364; fax: +82 51 513 0212

\*Corresponding authors. Tel.: +8251 510 2389; fax: +82 51 514 4457

E-mail: [heeje@pusan.ac.kr](mailto:heeje@pusan.ac.kr) (H.J. Kim)

E-mail: [yescho@pusan.ac.kr](mailto:yescho@pusan.ac.kr) (Y.-R. Cho)

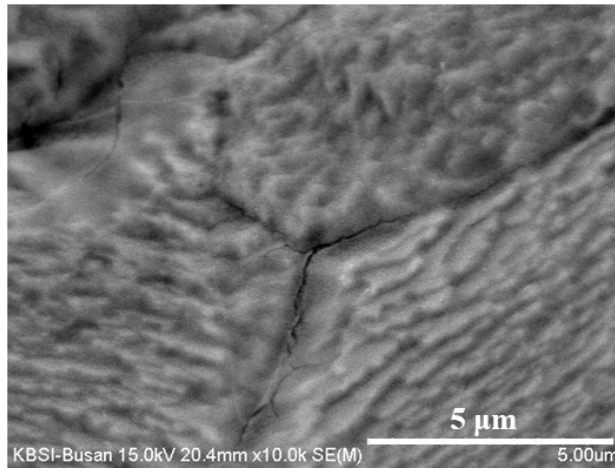

Fig. S1. SEM image of PbMoO<sub>4</sub>/CdMoO<sub>4</sub> composite electrode after 5000 GCD cycles.
